1

2 **Phosphorylation controls RNA binding and transcription by the influenza virus polymerase**

3 Anthony R. Dawson<sup>1</sup>, Gary M. Wilson<sup>2</sup>, Elyse C. Freiburger<sup>3</sup>, Arindam Mondal<sup>1+</sup>, Joshua J.  
4 Coon<sup>2,3</sup>, and Andrew Mehle<sup>1\*</sup>

5

6 <sup>1</sup>Department of Medical Microbiology & Immunology, <sup>2</sup>Department of Chemistry, <sup>3</sup>Department of  
7 Biomolecular Chemistry, University of Wisconsin–Madison, Madison, WI

8

9 \*Corresponding Author contact information:  
10 Andrew Mehle, [amehle@wisc.edu](mailto:amehle@wisc.edu); mehlelab.com; @mehlelab; ORCID 0000-0001-6060-4330

11 +Current address: Bio Science, India Institute of Technology Kharagpur

12 Keywords:  
13 influenza virus, post-translation modification, replication, transcription, mass spectrometry

14

15

## 16 **Abstract**

17 The influenza virus polymerase transcribes and replicates the viral genome. The proper timing  
18 and balance of polymerase activity is important for successful replication. We previously showed  
19 that phosphorylation regulates genome replication by controlling assembly of the replication  
20 machinery (Mondal, et al. 2017). However, it remained unclear whether phosphorylation directly  
21 regulated polymerase activity. Here we identified polymerase phosphosites that control its  
22 function. Mutating phosphosites in the catalytic subunit PB1 altered polymerase activity and virus  
23 replication. Biochemical analyses revealed phosphorylation events that disrupted global  
24 polymerase function by blocking the NTP entry channel or preventing RNA binding. We also  
25 identified a regulatory site that split polymerase function by specifically suppressing transcription.  
26 These experiments show that host kinases phospho-regulate viral RNA synthesis directly by  
27 modulating polymerase activity and indirectly by controlling assembly of replication machinery.  
28 Further, they suggest polymerase phosphorylation may bias replication versus transcription at  
29 discrete times or locations during the infectious cycle.

30

## 31 **Introduction**

32 All RNA viruses encode machinery both to express viral transcripts and to replicate genomes.  
33 Negative sense RNA viruses must first transcribe using virally-encoded RNA-dependent RNA  
34 polymerases (RdRPs) that are packaged into virions. The viral RdRP subsequently replicates the  
35 genome, often with the help of protein products from the recently produced mRNA. Regulating  
36 the balance and timing of transcription and replication is crucial for successful infection.

37 Viruses employ diverse strategies to control the abundance of virally-derived RNAs. Many RNA  
38 viruses rely on RdRP co-factors whose activity is dynamically regulated by post-translational  
39 modifications. For example, the Ebola virus polymerase is regulated by the viral transcription

40 factor VP30. VP30 promotes transcription, whereas phosphorylation of VP30 results in its  
41 exclusions from transcription complexes favoring genome replication (Biedenkopf et al., 2016). A  
42 similar strategy is employed by Marburg virus (Tigabu et al., 2018). Dynamic phosphorylation of  
43 the M2-1 protein from respiratory syncytial virus regulates viral transcription. M2-1 is a  
44 transcriptional processivity factor whose function is proposed to require cycles of phosphorylation  
45 and dephosphorylation by cellular enzymes (Cartee and Wertz, 2001; Richard et al., 2018).  
46 Phosphorylation also regulate global RNA synthesis. The phosphoprotein (P) from vesicular  
47 stomatitis virus is a polymerase co-factor. Phosphorylation on the N-terminus of P is important for  
48 transcription and replication (Chen et al., 2013; Mondal et al., 2014). The dynamic and fully  
49 reversible nature of phosphorylation enables localized and temporal control of viral proteins and  
50 may help progression through the infectious cycle. Phosphorylation of polymerase co-factors is  
51 thus a common strategy to regulate transcription and replication. However, influenza A virus and  
52 other members of *Orthomyxoviridae* do not encode polymerase co-factors and it remains unclear  
53 how their polymerases are regulated.

54 Influenza A virus contains eight negative-sense RNA genome segments packaged into virions as  
55 ribonucleoprotein (RNP) complexes. RNPs are double helical flexible rod-like structures  
56 containing the viral genome coated by oligomeric nucleoprotein (NP) and bound at both ends by  
57 the viral polymerase (Arranz et al., 2012; Klumpp et al., 1997; Moeller et al., 2012; Pons et al.,  
58 1969). The viral polymerase is a heterotrimeric complex composed of the PB1, PB2 and PA  
59 subunits. Immediately following uncoating, RNPs are trafficked to the nucleus where synthesis of  
60 all virally-derived RNA occurs (Herz et al., 1981; Jackson et al., 1982). Infection initiates with a  
61 pioneering round of transcription from the incoming RNPs. The viral polymerase performs cap-  
62 snatching where a short capped oligonucleotide derived from the host is used to prime  
63 transcription (Bouloy et al., 1978; Plotch et al., 1979). Unlike transcription, replication initiates in  
64 a primer-independent fashion to create a positive-sense intermediate (cRNA) that serves as a

65 template for vRNA production (Hay et al., 1977). Replication requires concomitant assembly into  
66 newly formed RNPs to stabilize the viral genome (Vreede et al., 2004). Newly formed vRNPs can  
67 either be packaged into virions or serve as templates for additional rounds of transcription or  
68 replication.

69 The processes regulating polymerase activity are not fully defined. Some regulation simply  
70 requires the production of specific viral proteins or RNAs. The stable products from incoming  
71 RNPs are viral mRNAs, even though incoming RNPs are capable of making cRNA as well.  
72 Replication occurs later when newly synthesized NP is able to coat cRNA genomes and protect  
73 them from degradation (Vreede et al., 2004). Newly synthesized viral polymerase binds nascent  
74 RNA products and interacts with cRNP-bound polymerases to stimulate production of full-length  
75 vRNA (Fodor and te Velthuis, 2019). The nuclear export protein (NEP) and small viral RNAs  
76 (svRNA), both of which are made at later stages of infection, further bias the polymerase to  
77 replication (Perez et al., 2010; Robb et al., 2009) Infection also induces broad changes in signaling  
78 cascades, and multiple host and viral proteins are regulated by post-translational modifications  
79 during influenza virus infection (Dawson and Mehle, 2018). Like many other RNA viruses,  
80 phosphorylation of viral proteins plays a key role in regulating the influenza virus replication  
81 machinery. We have previously shown that phosphorylation of NP regulates *de novo* RNP  
82 assembly (Mondal et al., 2015, 2017). The protein kinase C (PKC) family, and PKC $\delta$  in particular,  
83 phosphorylates NP at its homotypic interface to block NP oligomerization. This is proposed to  
84 create a pool of monomeric NP that is subsequently licensed for oligomerization by a cellular  
85 phosphatase, possibly CDC25B (Cui et al., 2018).

86 PKC $\delta$  phospho-regulates NP oligomerization and by extension the ability of the polymerase to  
87 replicate the viral genome (Mondal et al., 2017). These studies also provided intriguing data  
88 suggesting that the polymerase may also be phosphorylated. Whether phosphorylation directly

89 regulates polymerase activity is unclear. Here we extensively map phosphorylation sites on the  
90 polymerase subunit PB1 and characterize their function. PB1 is the structural and catalytic core  
91 of the enzyme, and we define PB1 phospho-sites that inhibit RNA synthesis by blocking global  
92 catalytic function or genomic RNA binding. We also identified a regulatory site that split the  
93 function of the polymerase; mimicking phosphorylation at PB1 S673 suppressed transcription  
94 without altering genome replication. Viruses encoding phospho-ablative mutants at these  
95 positions displayed altered replication kinetics, whereas phospho-mimetic mutants did not  
96 replicate. These data demonstrate that phosphorylation directly regulates viral polymerase activity  
97 and may provide a mechanism to bias populations of polymerase towards replication or  
98 transcription.

## 99 **Results:**

### 100 **Phosphorylation alters activity of influenza virus polymerase**

101 We had previously shown that PKC $\delta$  regulates RNP assembly by modifying NP and preventing  
102 premature NP oligomerization (Mondal et al., 2017). This work also revealed slower migrating  
103 species of the PB2 polymerase subunit that raised the possibility that the polymerase itself was  
104 phosphorylated in the presence of PKC $\delta$ . To test this possibility, we assessed the migrations  
105 patterns of PB2 before or after phosphatase treatment. We sought to study direct effects on the  
106 viral polymerase, but this cannot be done in the context of an RNP as PKC $\delta$  regulates NP function.  
107 We eliminated this confounder by using a short vRNA template (vNP77) that does not require NP  
108 for replication or transcription, and thus decouples RNP assembly from RNA synthesis activities  
109 (Turrell et al., 2013). The viral polymerase was expressed in cells with constitutively active PKC $\delta$   
110 and vNP77 and immuno-purified samples were analyzed by western blot (Figure 1A). Slower  
111 migrating species were detected for PB2, confirming our prior results. Treating samples with  
112 phosphatase collapsed these species into a single band migrating at the expected position for

113 PB2, suggesting that PB2 is phosphorylated. A shorter exposure of the same gel confirmed  
114 equivalent loading of PB2.

115 We then asked whether PKC $\delta$  expression affects RNA synthesis activities of the polymerase. The  
116 viral polymerase and vNP77 were expressed in cells in the presence or absence of constitutively-  
117 active PKC $\delta$ . Primer extension analysis of RNA extracted from these samples quantified  
118 transcription (mRNA) and replication (vRNA) products. Co-expression of PKC $\delta$  significantly  
119 impaired production of viral transcripts and replication products, without altering viral protein levels  
120 (Figure 1B). Together, these data indicate that the viral polymerase is phosphorylated and these  
121 modifications may alter intrinsic polymerase activity.

## 122 **The polymerase core is phosphorylated at highly conserved sites**

123 Given its potential to regulate polymerase activity, we performed a series of complementary  
124 experiments to extensively characterize polymerase phosphorylation (Figure 2A). We repeated  
125 experiments where phosphorylation was shown to affect polymerase function by expressing the  
126 viral polymerase, vNP77 and activated PKC $\delta$  in 293T cells. Polymerase was immuno-purified and  
127 analyzed phospho-peptide mass spectrometry (MS) in two independent experiments. In parallel,  
128 we analyzed samples from infected cells. Polymerase phosphorylation status may vary across  
129 multiple rounds of infection; therefore, we collected samples from low and high MOI infections  
130 performed in A549 cells and analyzed whole-cell lysate. We also allowed for the possibility that  
131 phosphorylation patterns change throughout a single infection by analyzing RNP  
132 immunoprecipitations from both individual and pooled time points from synchronized infections.  
133 The amount of each sample used in the pooled lysate was adjusted to approximate similar levels  
134 of viral protein for all time points. These approaches allowed for high-confidence identification of  
135 phosphorylation sites on the viral polymerase (Supplemental Table 1).

136 We focused our analysis on PB1, the subunit that catalyzes RNA synthesis. A total of 13  
137 phosphorylated residues were identified on PB1 in all experimental conditions, of which 8 were  
138 also detected in the context of infection (Supplemental Table 1). Phosphorylation occurred  
139 primarily on threonine and serine residues, with only one phospho-tyrosine identified. Most of the  
140 phospho-sites are highly conserved in human H1N1 and H3N2 strains and highly pathogenic  
141 H5N1 strains (Figure 2B). Some of the identified phosphorylation sites overlapped between our  
142 infected and transfected cells (S216, T223, S673), whereas others were identified only during  
143 infection (T228, Y253, T570, S712, S720) or when polymerase was co-expressed with PKC $\delta$   
144 (S478, S384). We placed high priority on the four sites that we identified in at least two separate  
145 experiments: PB1 S216, T223, S384, and S673. These phospho-sites could be broadly  
146 categorized into those that are proximal to the catalytic center (S216) or the template entry  
147 channel (T223, S384 and S673) (Figure 2B). We also included PB1 S478 given its close proximity  
148 to the catalytic center. Phosphorylation at PB1 T223 was identified during infection, confirming  
149 and extending the importance of prior work that had identified this phospho-site from transfected  
150 cells (Hutchinson et al., 2012). None of the other phospho-sites have been previously reported.

## 151 **Phosphorylation status of PB1 impacts the ability of the polymerase to produce RNA and** 152 **infectious virions**

153 To assess the biological relevance of these phosphorylation events, we attempted to rescue  
154 influenza virus encoding PB1 mutants harboring phospho-mimetic aspartic acid (D) or phospho-  
155 ablative alanine (A) mutations. All tested phospho-ablative PB1 constructs produced virus,  
156 whereas phospho-mimetic mutants at PB1 T223, S478 and S673 failed to yield virus despite  
157 multiple attempts. For PB1 mutants that support production of infectious virus, we measured viral  
158 gene expression during single-cycle infection of A549 cells (Figure 3A). Phospho-ablative mutants  
159 produced similar amounts of NP mRNA compared to WT, with the exception of PB1 T223A that  
160 had decreased transcription and PB1 S673A that exhibited a significant 5-fold increase in gene

161 expression. Phospho-mimetic mutants displayed more subtle phenotypes, with PB1 S216D  
162 slightly above and PB1 S384D was slightly below WT levels. These viruses were then assayed  
163 in a multi-cycle replication assay (Figure 3B). All viruses exhibited roughly similar replication  
164 kinetics at 12 and 24 hpi. However, PB1 T223A plateaued at peak titers ~10-fold lower than WT  
165 and the titers of PB1 S478A and S673A rapidly declined at 72 and 96 hpi to yield final titers ~10-  
166 fold lower than WT. PB1 harboring phospho-mimetics at position S216 and S384 yielded virus  
167 that replicates similar to WT virus despite producing disparate levels of NP transcripts (Figure 3A-  
168 B). Constitutive phosphorylation at PB1 T223, S478, and S673 is incompatible with production of  
169 infectious virus, whereas the complete loss of phosphorylation at positions PB1 T223 and S673  
170 also disrupts transcription and viral replication. These data suggest that differential  
171 phosphorylation of PB1 is important for successful infection.

172 Replication assays revealed PB1 phospho-residues important for the infectious cycle. We next  
173 focused solely on polymerase activity by performing primer extension assay for polymerases  
174 containing WT or phospho-mutant PB1 (Figure 4A, Figure 4 Figure Supplement 1). WT  
175 polymerase produced significant amounts of viral mRNA, the replication intermediate cRNA, and  
176 vRNA indicating successful transcription and replication of the input genome. Phospho-mimetic  
177 mutants that failed to produce infectious virus also displayed defects in RNA synthesis.  
178 Polymerases with PB1 S223D or S478D exhibit profound defects with only background input  
179 vRNA levels and no detectable transcription or replication products. These results mirrored those  
180 obtained with a catalytically dead PB1 D445A/D446A mutant (PB1a) (Vreede et al., 2004).  
181 Remarkably, PB1 S673D replicated viral RNA, but showed a severe reduction in mRNA.  
182 Transcriptional defects for PB1 S673D were as strong as the previously described transcriptional  
183 mutant PB1 K669A/R670A (Figure 4A, Figure 4 Figure Supplement 1)(Kerry et al., 2008). These  
184 data suggest that phosphorylation at PB1 S673 biases plus-sense RNA synthesis away from  
185 transcription and towards replication. PB1 S216D, S384D, and S673A generated transcription



186 and replication products similar to WT PB1. Some of the differences in transcription detected  
187 during single-cycle infection (Figure 3A) were not fully recapitulated in primer extension assays  
188 (Figure 4A). This could be explained by the simplified nature of primer extension assays that lack  
189 viral factors that may modulate RNA production during infection (Robb et al., 2009).

190 Polymerase activity requires multiple steps for successful replication and transcription, beginning  
191 with protein expression, trimer assembly, RNA binding, RNP assembly, and ultimately the  
192 synthesis of new RNA products (Fodor and te Velthuis, 2019). Primer extension reports on the  
193 cumulative success of this process. We therefore systematically investigated each step to identify  
194 regulatory points affected by PB1 phosphorylation. PB1 stability and polymerase trimer formation  
195 were assayed by expressing proteins in cells, immuno-purifying PB1, and probing for co-  
196 precipitating PB2 and PA (Figure 4B). All PB1 mutants expressed and formed trimers at  
197 approximately WT levels, independent of whether they were phospho-ablative or phospho-  
198 mimetic. Thus, phosphorylation of PB1 at these sites does not control trimer assembly.  
199 Additionally, as polymerase trimers form in the cell nucleus, these data imply that defects in RNA  
200 production are not due to faulty nuclear import of polymerase subunits (Deng et al., 2005). RNP  
201 assembly was next investigated by expressing RNP components in cells, immuno-precipitating  
202 NP and probing for co-precipitating polymerase (Figure 4C). Active polymerase will replicate the  
203 viral genome and amplify RNP assembly. We therefore utilized the catalytically dead PB1a to  
204 measure initial RNP formation that is independent of polymerase activity. PB1 mutants with  
205 defects in polymerase activity in primer extension assays failed to form productive RNPs, but the  
206 extent of the defect suggests different causes. PB1 T223D was completely excluded from RNPs,  
207 despite that fact that it forms trimers, suggesting phosphorylation at this position precludes  
208 incorporation into an RNP. PB1 S478D, however, assembled RNPs at low levels comparably to  
209 PB1a, indicating that RNP assembly *per se* is unaffected by this mutant. Rather, RNP assembly  
210 defects here stem from catalytic defects in the polymerase and not other steps in the process.

211 The PB1 S673D phospho-mimetic do not alter RNP assembly, consistent with its ability to  
212 synthesize WT levels of genomic RNAs. In sum, loss of phosphorylation did not alter assembly  
213 and activity of RNPs in these assay. Conversely, mimicking constitutive phosphorylation at PB1  
214 T223 or PB1 S478 prevented formation of productive RNPs and disrupted RNA synthesis. Finally,  
215 phosphorylation at PB1 S673 appears to toggle the viral polymerase primarily into replication  
216 mode.

### 217 **PB1 T223 phosphorylation inhibits vRNA binding and cRNA stabilization**

218 Incoming RNPs synthesize both viral mRNA and cRNA, but cRNA is rapidly degraded; the  
219 polymerase and NP that would assemble into RNPs and protect cRNA from degradation have not  
220 yet been synthesized (Vreede et al., 2004). Whereas PB1 S478D was able to form low levels of  
221 RNPs, the complete failure of PB1 T223D was suggestive of defects in RNA binding. To test this  
222 possibility, we examined whether PB1 mutants could bind and stabilize cRNA during infection  
223 (Figure 5A). Polymerase with WT or mutant PB1 was expressed in cells prior to infection with WT  
224 virus. The oligomerization-deficient NP<sub>E339A</sub> was also pre-expressed to help stabilize cRNA while  
225 focusing the assay only on RNA made from the incoming RNPs. Cells were treated with  
226 actinomycin D during infection so only pre-expressed viral proteins were present. Primer  
227 extension showed that cRNA was stabilized by WT PB1 as expected (Vreede et al., 2004).  
228 Equivalent levels of vRNA in each condition confirmed efficient infection and delivery of vRNPs in  
229 all settings (Figure 5 Supplemental Figure 1). Trimers harboring PB1 S478D, which are unable to  
230 synthesize viral RNAs (Figure 4A), still stabilized cRNA yielding levels slightly higher than WT  
231 (Figure 5A). PB1 T223A also showed a minor increase in cRNA levels. However, polymerases  
232 with PB1 T223D exhibited a significant drop in cRNA stabilization. All of the other phospho-mutant  
233 polymerases stabilized cRNA to WT levels, consistent with their ability to replicate viral RNA. This  
234 was true even for PB1 S673D, which is replication competent but produces lower levels of mRNA  
235 (Figure 4A).

236 Viral RNA promoter binding is essential for stabilizing genomic RNA, suggesting that mimicking  
237 phosphorylation at PB1 T223 interferes with RNA binding. RNA immunoprecipitation assays were  
238 performed to measure promoter binding (Figure 5B). Polymerase and segment 6 vRNA were  
239 expressed in cells and polymerase was purified by immunoprecipitating PB1. Co-precipitating  
240 vRNA was detected by primer extension. vRNA co-purified with WT PB1, but not in its absence  
241 or when all polymerase subunits were excluded from the assay. PB1 T223D completely failed to  
242 bind vRNA, even though vRNA was readily detected for PB1 T223A. PB1 S478D bound vRNA,  
243 consistent with its ability to stabilize cRNA and form low levels of RNPs. If anything, PB1 S478D  
244 showed higher binding than both WT and PB1 S478A. These data parallel those from the  
245 stabilization assays. Multiple lines of investigation identify discrete defects caused by mimicking  
246 phosphorylation. Constitutive phosphorylation at PB1 S478 appears to disrupt catalysis without  
247 affecting RNA binding or initial RNP formation. Conversely, PB1 T223D was unable to stabilize  
248 cRNA or bind vRNA, suggesting that its inability to assemble RNPs and synthesize viral RNAs  
249 arises from defects in template binding.

## 250 **Discussion**

251 Multiple mechanisms converge to regulate the influenza polymerase and bias production of either  
252 transcripts, the replication intermediate cRNA, or genomic vRNA. Here we reveal that  
253 phosphorylation of the polymerase directly regulates its activity. The core polymerase subunit  
254 PB1 was phosphorylated at multiple conserved sites, with clusters proximal to the catalytic center  
255 or the template entry channel. Mimicking phosphorylation at PB1 S478 or T223 disrupted global  
256 polymerase function by affecting catalytic activity or template binding, respectively. By contrast,  
257 phosphorylation at PB1 S673 preferentially suppressed transcription to create a replicase form of  
258 the polymerase. In all cases, mimicking phosphorylation at these key sites blocked the production  
259 of infectious virus, whereas ablating phosphorylation led to defects in replication. These data

260 demonstrate that phosphorylation directly controls polymerase activity by either inhibiting or  
261 regulating RNA production.

262 The influenza polymerase performs diverse functions as transcription peaks early in infection,  
263 followed by production of the replication intermediate cRNA, and ultimately the final replication  
264 product vRNA (Robb et al., 2009). The different functions are achieved in part by discrete  
265 conformations of the viral polymerase (Fodor and te Velthuis, 2019). One major change involves  
266 re-positioning of the 3' end of template RNA from the surface of the polymerase to the active site  
267 (Reich et al., 2014, 2017). Two of our PB1 phospho-mutants may affect this process. Phospho-  
268 mimetics at PB1 T223 completely disrupts RNA binding and stabilization of the nascent genome,  
269 ablating polymerase activity and the production of mutant virus (Figures 4-5). Our data confirm  
270 prior identification of this phospho-site and predictions that phosphorylation at this position might  
271 alter RNA binding (Hutchinson et al., 2012; Weber et al., 2019). Whereas phosphorylation at PB1  
272 T223 disrupts all RNA binding and activity, phosphorylation at PB1 S673 appears to differentially  
273 suppress transcription without affecting replication (Figure 4). Close inspection of viral structures  
274 reveals a potential mechanism. The 3' end of the vRNA genome makes a pronounced turn at  
275 bases G9 and C8 as it threads through the template entry channel (Pflug et al., 2014). Flexibility  
276 at this site allows the end of the template to be directed into the active site in an initiation  
277 conformation, or to the periphery of the polymerase in a pre-initiation state (Kouba et al., 2019).  
278 Residue S673 is positioned in the crook of this turn and makes hydrogen bonds with the backbone  
279 of U7 and U10 (Reich et al., 2014). Once in the active site, the 3' end of the template must be  
280 located in distinct positions suitable for either primer-independent replication or primer-dependent  
281 transcription (Kouba et al., 2019; Reich et al., 2017). It is possible that phosphorylation at PB1  
282 S673 alters the trajectory of the template RNA in a way that prevents pairing with the primer or its  
283 extension, without disrupting the replication conformations or RNA binding altogether.  
284 Alternatively, basic residues K669, R670 and R672 in this region had previously been shown to

285 be important for transcription and activating cap binding by PB2, but not replication (Kerry et al.,  
286 2008). Perhaps phosphorylation at S673 partially neutralizes their charge to reveal the same  
287 phenotype as when these basic residues were mutated to alanine. Independent of the exact  
288 molecular mechanism, phosphorylation at PB1 S673 could be a way to establish replicase-  
289 specific polymerases.

290 PKC $\delta$  interacts with the viral polymerase and modifies NP to control RNP assembly (Mondal et  
291 al., 2017). Here we showed that phosphorylation was identified on PB1 S478 in cells expressing  
292 active PKC $\delta$ . Mutational analysis revealed that the phospho-mimetic PB1 S478D is functionally  
293 analogous to the well-characterized PB1a allele that mutates the conserved SDD motif in the  
294 active site: PB1 S478D retains the ability to bind the viral promoter, stabilizes cRNA, and forms  
295 initial RNPs, but is catalytically inactive (Figure 4-5). S478 lies in the NTP channel of the  
296 polymerase and phosphorylation would likely interfere with NTP transit or positioning. (Kouba et  
297 al., 2019). This polymerase is catalytically inactive, but like PB1a may still impact overall  
298 polymerase output by functioning in *trans* to stimulate cRNP activity (York et al., 2013).

299 Our studies reveal that constitutive phosphorylation largely inhibits specific polymerase functions,  
300 whereas phospho-ablative mutants are more tolerated. Phospho-ablative mutants at PB1 T223,  
301 S478 and S673 retained polymerase function, but exhibit dysregulated abundance and altered  
302 replication profiles (Figure 3). These data suggest that balanced phosphorylation at these  
303 positions is important for normal polymerase output. The phospho-sites are all located at sites  
304 that are not immediately on the surface of the trimeric polymerase. This suggests kinases modify  
305 PB1 during its translation or assembly into the trimer. It further raises the possibility that these  
306 modifications cannot be accessed by a phosphatase and are thus static. Instead of dynamically  
307 regulating the activity of an individual polymerase, phosphorylation at these sites might  
308 permanently assign a function and establish pools of specialized polymerases. Phosphorylation

309 indirectly controls genome replication by regulating RNP assembly, and we now show that  
310 modifications on the viral polymerase directly control its activity to regulate product output.

311

## 312 **Materials and Methods**

### 313 **Cells, viruses, plasmids, and transfections:**

314 All experiments were conducted with A549 (CCL-185), HEK 293T (CRL-3216), MDCK (CCCL-  
315 34), or MDBK (CCL-22) cells acquired from ATCC. Cells were maintained in Dulbecco's modified  
316 Eagle's medium (DMEM; Mediatech 10-013-CV) with 10% FBS and grown at 37°C in 5% CO<sub>2</sub>.  
317 Cells were regularly verified as mycoplasma negative using MycoAlert (Lonza LT07-218).

318 All virus and virus-derived protein expression constructs are based on A/WSN/1933. Expression  
319 constructs for the viral polymerase and NP were described previously (Engelhardt et al., 2005;  
320 Mehle and Doudna, 2008). FLAG-tagged PB1 expression constructs were generated via restriction  
321 cloning to express PB1 with a C-terminal 3X FLAG tag. Mutations were introduced by inverse  
322 PCR and confirmed by sequencing. The catalytically dead PB1a (PB1 D445A/D446A) and  
323 transcription-defective PB1 K669A/R670A mutants were previously characterized (Kerry et al.,  
324 2008; Vreede et al., 2004). Plasmid expressing the catalytic domain of PKC $\delta$  was previously  
325 described (Soh and Weinstein, 2003) (Addgene plasmid #16388).

326 Viruses were prepared using the pBD bi-directional reverse genetics system and pTM-All  
327 derivatives where multiple gene segments are consolidated on a single plasmid (Mehle and  
328 Doudna, 2008; Neumann et al., 2005). Rescued viruses were amplified on MDBK cells and titered  
329 on MDCK cells by plaque assay. When preparing mutant virus, the presence of the intended  
330 mutation was confirmed by sequencing RT-PCR product. WSN virus encoding FLAG-tagged PB2  
331 (Dos Santos Afonso et al., 2005) was used for infections for mass spectrometric analysis and  
332 cRNA stabilization assays.

333 Transfections were performed using either TransIT 2020 (Mirus MIR5400) or PEI MAX40  
334 (Polysciences 24765-1) following the manufacturers' recommendation.

### 335 **Antibodies**

336 FLAG-PB2 purifications for mass spectrometry were performed using M2 antibody (Sigma F1804)  
337 and captured using protein A dynabeads (Invitrogen 10002). Other FLAG immunoprecipitations  
338 were performed with M2 Affinity Gel (Sigma A2220). The following antibodies were used for  
339 western blot analysis:  $\alpha$ -PB1 (Mehle and Doudna, 2008),  $\alpha$ -PB2 (Mehle and Doudna, 2008),  $\alpha$ -  
340 PA (Genetex 125933), HA-HRP (3F10; Sigma 12013819001), M2-HRP (Sigma 8592). The mouse  
341  $\alpha$ -NP monoclonal antibody H16-L10-4R5 (Bioxcell BE0159) (Yewdell et al., 1981) was used for  
342 both immunoprecipitation and western blot analysis of NP.

343

### 344 **Synchronized single-cycle infections and multicycle replication assays:**

345 Viral infections with A549 cells were performed in virus growth medium (DMEM, 0.2% BSA, 25mM  
346 HEPES, 0.25  $\mu$ g/mL TPCK-trypsin). Viral infections with 293T cells were performed in OptiMEM  
347 (Invitrogen) containing 2% FBS. For synchronized infections, cell monolayers were washed twice  
348 with ice-chilled PBS, incubated with inoculum for 1 hr at 4° C, followed by removal of inoculum  
349 and addition of pre-warmed fresh VGM (37° C) (Larson et al., 2019). Cells were maintained at  
350 37° C for the duration of the infection. Multicycle replication assays were performed in A549 cells  
351 by inoculating cells in triplicate at an MOI 0.001. Virus was sampled at the indicated time points  
352 and titers were determined by plaque assay on MDCK cells.

353 Gene expression was measured during an asynchronous infection by inoculating A549 cells at  
354 an MOI of 0.05 for 8 h. Infections were terminated and total RNA was extracted from cells using  
355 TRIzol (Invitrogen). 250 ng of total RNA was subject to poly-dT primed reverse transcription using  
356 MMLV-RT. Resulting cDNA was used for qPCR to detect GAPDH and NP mRNA with the iTaq

357 Universal SYBR Green Supermix (Bio-Rad 1725121). Fold changes in NP mRNA were calculated  
358 using the  $\Delta\Delta C_T$  method.

359 **Polymerase activity assays:**

360 HEK 293T cells were transfected with plasmids expressing NP, PB2, FLAG-tagged PB1, FLAG-  
361 tagged PA, and segment 6 vRNA (NA). Total RNA was extracted using TRIzol 24 hr after  
362 transfection.

363 **Primer Extension analysis:**

364 RNA was subject to primer extension analysis for genomic (vRNA), complementary (cRNA), and  
365 messenger (mRNA) corresponding to segment 6. Primer extension analysis was performed as  
366 previously described for full-length and short (NP77) templates (Baker et al., 2018; Kirui et al.,  
367 2016). Briefly, RNA and the appropriate radiolabeled primers were boiled for 2 min and snap-  
368 chilled on ice. Samples were pre-heated to 42° C and pre-heated reaction mixture was added for  
369 a final reaction containing 50 mM Tris-HCl (pH 8.3), 75 mM KCl, 3 mM MgCl<sub>2</sub>, 5 mM DTT, 40 units  
370 RNAsin+ (Promega N2611), and house-made MMLV-RT (Kirui et al., 2016). Samples were  
371 incubated for 1 hr at 42° C. Reactions were terminated with an equal volume of 2x RNA loading  
372 dye (47.5% formamide, 0.01% SDS, 0.5 mM EDTA containing bromophenol blue and xylene  
373 cyanol), boiled for 2 mins and snap-chilled on ice prior to resolving on 6% (full-length templates)  
374 or 12% (short templates) denaturing polyacrylamide gels containing 0.5X TBE and 7M Urea. Gels  
375 were fixed (40% methanol, 10% acetic acid, 5% glycerol) for 30 mins, dried, quantified by  
376 phosphorimaging, and analyzed using Image Studio software (Licor).

377

378 **Preparation of samples for mass spectrometry:**

379 Mass spectrometry was performed on both transfected and infected cells. HEK 293T cells (3 x  
380 100mm dishes containing approximately 6x10<sup>6</sup> cells) were transfected to express PB1, FLAG-  
381 tagged PB2, PA and vNP76 (Turrell et al., 2013). 24 hr later, cells were lysed in RIPA Buffer



382 (150mM NaCl, 50mM Tris pH 7.5, 0.5% w/v sodium deoxycholate, 0.1% w/v SDS, 1% w/v Ipegal  
383 630, 2mM EDTA) in the presence of protease inhibitors and phosphatase inhibitors for 20 mins  
384 at 4°C. Lysates were sonicated and then cleared via centrifugation at 4° C. FLAG-tagged PB2  
385 was immunoprecipated using M2 antibody overnight at 4° C. Immunocomplexes were captured  
386 using protein A dynabeads (Invitrogen 10002D) for 2 hr. Immunoprecipitations were washed twice  
387 with RIPA buffer and 4 times with NTE (100mM NaCl, 10mM Tris pH 7.5, 1mM EDTA). Protein  
388 was eluted with 8M urea in NTE. Samples were frozen at -80° C prior to mass spectrometric  
389 analysis.

390 For samples prepared from virally-infected cells, A549 cells were synchronously infected with  
391 WSN at an MOI of 5. Cells were collected at 2.5 hpi ( $30 \times 10^6$  cells), 5 hpi ( $18 \times 10^6$  cells), 7.5 hpi  
392 ( $18 \times 10^6$  cells), and 10 hpi ( $12 \times 10^6$  cells). Cell numbers were adjusted in an attempt to account for  
393 lower amounts of viral proteins early during infection. Cells were scraped into ice-chilled PBS and  
394 collected by centrifugation. NP immunoprecipitations were performed as above using  $\alpha$ -NP  
395 monoclonal antibody H16-L10-4R5. Samples were also prepared using the same approach in  
396 separate experiments where A549 cells were infected with WSN at an MOI of 0.1 for 24 hr or an  
397 MOI of 5 for 6hr. Cell pellets and immunoprecipitations were frozen at -80° C prior to mass  
398 spectrometric analysis.

## 399 **Mass spectrometry**

### 400 *Sample preparation for Nano-LC-MS/MS*

401 Infected cells were lysed in 6M guanidine-HCl for 10 min at 100 °C. Protein was precipitated by  
402 addition of methanol to a final concentration of 90% and pelleted by centrifugation at 12,000 x G  
403 for 10 min. The supernatant was discarded and pellet was resuspended in 8M urea, 50 mM Tris  
404 (pH 8.0), 10 mM tris(2-carboxyethyl)phosphine) (TCEP) and 40 mM chloroacetamide and  
405 rocked at room temperature for 30 min to reduce and alkylate cysteines. The sample was

406 diluted to a urea concentration of less than 1.5 M with 50 mM Tris (pH 8.0) before adding  
407 protease grade trypsin (Promega) at an enzyme:protein ratio of 1:50 (mg:mg). The samples  
408 were rocked overnight at room temperature during the digestion. 10% trifluoroacetic acid was  
409 added to the solution to bring the pH of the sample less than 2 before desalting and peptide  
410 isolation using Strata-X reverse phase resin (Phenomenex). Samples were dried under reduced  
411 pressure, resuspended in 0.2% formic acid, and quantified by Pierce Quantitative Colorimetric  
412 Peptide Assay (Thermo Fisher Scientific). Phosphopeptides were enriched for each sample  
413 from 2 mg tryptic peptides using immobilized metal affinity chromatography (Ti-IMAC  
414 MagResyn, ReSyn Biosciences).

#### 415 *Nano-LC-MS/MS Data Acquisition*

416 Each sample was analyzed using an Q-LTQ-OT tribrid mass spectrometer (Orbitrap Fusion  
417 Lumos) during a 90 min nano-liquid chromatography using a Dionex UltiMate 3000 RSLCnano  
418 system (Thermo Fisher Scientific). MS parameters differed for the analysis of phosphopeptides  
419 enriched and unenriched sample. For unenriched sample, MS1 survey scans were acquired in  
420 the Orbitrap (Resolution – 240K, AGC Target –  $1 \times 10^6$ , Scan Range – 300-1,350 Da, Maximum  
421 Injection Time – 100 ms). MS2 spectra of observed precursors were acquired in the ion trap  
422 (Resolution – Rapid, AGC target  $4 \times 10^4$ , Scan Range – 200-1,200, Maximum Injection Time – 18  
423 ms) following quadrupole isolation (0.7 Da) and higher energy collisional dissociation (25%  
424 NCE). For phosphopeptides enriched samples, MS1 survey scans were acquired in the Orbitrap  
425 (Resolution – 60K, AGC Target –  $1 \times 10^6$ , Scan Range – 300-1,350 Da, Maximum Injection Time  
426 – 50 ms). Observed precursors were also analyzed in the Orbitrap (Resolution – 15K, AGC  
427 Target –  $5 \times 10^4$ , Scan Range – 150-1,500, Maximum Injection Time – 50 ms) following  
428 quadrupole isolation (1.6 Da) and higher energy collisional dissociation (25 % NCE).  
429 Monoisotopic precursor isolation and a dynamic exclusion of 15 s were enabled for both  
430 methods.

431 *Data Analysis*

432 Thermo RAW data files were searched using MaxQuant (version 1.5.3.51) with the Andromeda  
433 search algorithm against a concatenated target-decoy database of human and influenza  
434 proteins using default search tolerances (Cox et al., 2011; Elias and Gygi, 2007). Specified  
435 search parameters included the fixed modification of carbamidomethylation at cysteine residues  
436 and variable modification for methinine oxidation. Phosphorylation of serine, threonine, and  
437 tyrosine were specified as variable modifications for phosphopeptide enriched data. Label free  
438 quantitation and intensity based absolute quantitation were enabled (Cox et al., 2014;  
439 Schwanhäusser et al., 2011).

440 **Polymerase formation assays:**

441 Polymerase assembly was measured as before (Kirui et al., 2014). FLAG-tagged PB1, PB2, and  
442 PA were expressed in transfected HEK 293T cells for 48 hr. Cells were lysed in co-IP buffer  
443 (50mM Tris pH 7.4, 150mM NaCl, 0.5% Igepal CA-630) in the presence of protease inhibitors for  
444 20mins at 4° C. Lysates were clarified by centrifugation and pre-cleared with protein-A agarose  
445 (Santa Cruz Biotech sc-2001) for 1hr. Lysates were then transferred to a new microcentrifuge  
446 tube and BSA was added to a final concentration of 5 mg/ml. FLAG-PB1 was immunoprecipitated  
447 overnight with M2-agarose. Immunoprecipitations were washed twice with co-IP buffer containing  
448 5 mg/mL BSA and 500mM NaCl and twice with co-IP buffer. Bound proteins were eluted by boiling  
449 in Laemmli buffer. Samples were then assayed via western blot analysis for presence of PB1,  
450 PB2, and PA.

451 **RNP reconstitution assays:**

452 NP, PB2, FLAG-tagged PB1, FLAG-tagged PA, and segment 6 vRNA (NA) were expressed in  
453 transfected HEK 293T cells for 48 hr, following prior approaches (Baker et al., 2018). Cells were  
454 lysed in co-IP buffer in the presence of protease inhibitors. Lysates were clarified by  
455 centrifugation, pre-cleared protein A agarose (Santa Cruz Biotech sc-2001) for 1 hr, and

456 transferred to a new tube where BSA was added to a final concentration of 5 mg/mL. NP was  
457 immunoprecipitated overnight with 3  $\mu$ g anti-NP antibody. Immunocomplexes were captured  
458 using protein A agarose (Sigma P2545) for 1 hr, washed twice with co-IP buffer containing 5  
459 mg/mL BSA and 500 mM NaCl, and twice with co-IP buffer. Bound proteins were eluted by boiling  
460 in Laemmli buffer. Samples were then assayed via western blot analysis for presence of NP, PB1,  
461 and PA.

#### 462 **cRNA stabilization assay**

463 cRNA stabilization was measured as previously described (Vreede et al., 2004, 2011). Briefly,  
464 HEK 293T cells were transfected to express the viral polymerase with the indicated PB1 subunit  
465 and an oligomerization deficient NP (NP<sub>E339A</sub>). 24 hr post-transfection, cells were treated with  
466 actinomycin D (5  $\mu$ g/mL) (Sigma A1410) for 30 mins prior to asynchronous infection with WSN in  
467 the presence of actinomycin D. Cells were harvested 6 hpi. Total RNA was extracted using TRIzol  
468 and used in primer extension analysis.

#### 469 **RNA immunoprecipitation vRNA binding assay:**

470 RNPs with FLAG-tagged PB1 were reconstituted in HEK 293T cells as above. Cells were lysed  
471 48 hr post-transfection in co-IP buffer supplemented with both protease inhibitors and RNasin  
472 (Promega N2515, 100 units/mL). Lysates were processed and immunoprecipitations were  
473 performed as described above for the polymerase formation assay. Protein from 10% of the  
474 immunoprecipitate was eluted by boiling in Laemmli buffer and assayed via western blot. RNA  
475 from 90% of the immunoprecipitate was extracted using TRIzol and analyzed by primer extension.

#### 476 **Statistics:**

477 Data represent at least 2-3 independent biological replicates. Technical replicates are indicated  
478 for each figure. Quantitative data are shown as mean  $\pm$  standard deviation for one biological  
479 replicate or the mean of means  $\pm$  standard error of measurement for multiple biological replicates.  
480 Single pair-wise comparisons were analyzed by Student's t-test. Multiple comparisons were

481 performed by a one-way ANOVA followed by Dunnett's *post hoc* analysis of pair-wise  
482 comparisons to WT.  $P < 0.05$  was considered significant. Statistics were calculated in Prism 8.

483

484 **Acknowledgements:**

485 We thank members of the Mehle and Coon lab for their constructive input. This work is funded  
486 by R01AI125271 to AM and JJC and R35GM118110 to JJC. ARD is funded by T32AI078985.

487 GMW is supported by T32GM008349. AM holds an Investigator in the Pathogenesis of  
488 Infectious Disease Award from the Burroughs Wellcome Fund.

489

490

491 **References**

- 492 Arranz, R., Coloma, R., Chichon, F.J., Conesa, J.J., Carrascosa, J.L., Valpuesta, J.M., Ortin, J.,  
493 and Martin-Benito, J. (2012). The structure of native influenza virion ribonucleoproteins. *Science*  
494 (80- ). 338, 1634–1637.
- 495 Baker, S.F., Ledwith, M.P., and Mehle, A. (2018). Differential Splicing of ANP32A in Birds Alters  
496 Its Ability to Stimulate RNA Synthesis by Restricted Influenza Polymerase. *Cell Rep.* 24, 2581-  
497 2588.e4.
- 498 Biedenkopf, N., Lier, C., and Becker, S. (2016). Dynamic Phosphorylation of VP30 Is Essential  
499 for Ebola Virus Life Cycle. *J. Virol.* 90, 4914–4925.
- 500 Bouloy, M., Plotch, S.J., and Krug, R.M. (1978). Globin mRNAs are primers for the transcription  
501 of influenza viral RNA in vitro. *Proc. Natl. Acad. Sci.* 75, 4886–4890.
- 502 Cartee, T.L., and Wertz, G.W. (2001). Respiratory Syncytial Virus M2-1 Protein Requires  
503 Phosphorylation for Efficient Function and Binds Viral RNA during Infection. *J. Virol.* 75, 12188  
504 LP – 12197.
- 505 Chen, L., Zhang, S., Banerjee, A.K., and Chen, M. (2013). N-terminal phosphorylation of  
506 phosphoprotein of vesicular stomatitis virus is required for preventing nucleoprotein from binding  
507 to cellular RNAs and for functional template formation. *J. Virol.* 87, 3177–3186.
- 508 Cox, J., Neuhauser, N., Michalski, A., Scheltema, R.A., Olsen, J. V., and Mann, M. (2011).  
509 Andromeda: A peptide search engine integrated into the MaxQuant environment. *J. Proteome*  
510 *Res.* 10, 1794–1805.
- 511 Cox, J., Hein, M.Y., Lubner, C.A., Paron, I., Nagaraj, N., and Mann, M. (2014). Accurate  
512 proteome-wide label-free quantification by delayed normalization and maximal peptide ratio  
513 extraction, termed MaxLFQ. *Mol. Cell. Proteomics* 13, 2513–2526.
- 514 Cui, L., Mahesutihan, M., Zheng, W., Meng, L., Fan, W., Li, J., Ye, X., Liu, W., and Sun, L.  
515 (2018). CDC25B promotes influenza A virus replication by regulating the phosphorylation of  
516 nucleoprotein. *Virology* 525, 40–47.
- 517 Dawson, A.R., and Mehle, A. (2018). Flu's cues: Exploiting host post-translational modifications  
518 to direct the influenza virus replication cycle. *PLoS Pathog.* 14, e1007205.
- 519 Deng, T., Sharps, J., Fodor, E., and Brownlee, G.G. (2005). In vitro assembly of PB2 with a  
520 PB1-PA dimer supports a new model of assembly of influenza A virus polymerase subunits into  
521 a functional trimeric complex. *J. Virol.* 79, 8669–8674.
- 522 Elias, J.E., and Gygi, S.P. (2007). Target-decoy search strategy for increased confidence in  
523 large-scale protein identifications by mass spectrometry. *Nat. Methods* 4, 207–214.
- 524 Engelhardt, O.G., Smith, M., and Fodor, E. (2005). Association of the influenza A virus RNA-  
525 dependent RNA polymerase with cellular RNA polymerase II. *J. Virol.* 79, 5812–5818.
- 526 Fodor, E., and te Velthuis, A.J.W. (2019). Structure and Function of the Influenza Virus  
527 Transcription and Replication Machinery. *Cold Spring Harb. Perspect. Med.*
- 528 Hay, A.J., Lomniczi, B., Bellamy, A.R., and Skehel, J.J. (1977). Transcription of the influenza  
529 virus genome. *Virology* 83, 337–355.
- 530 Herz, C., Stavnezer, E., Krug, R.M., and Gurney, T. (1981). Influenza virus, an RNA virus,

- 531 synthesizes its messenger RNA in the nucleus of infected cells. *Cell* 26, 391–400.
- 532 Hutchinson, E.C., Denham, E.M., Thomas, B., Trudgian, D.C., Hester, S.S., Ridlova, G., York,  
533 A., Turrell, L., and Fodor, E. (2012). Mapping the Phosphoproteome of Influenza A and B  
534 Viruses by Mass Spectrometry. *PLoS Pathog.* 8.
- 535 Jackson, D.A., Caton, A.J., McCreedy, S.J., and Cook, P.R. (1982). Influenza virus RNA is  
536 synthesized at fixed sites in the nucleus. *Nature* 296, 366–368.
- 537 Kerry, P.S., Willsher, N., and Fodor, E. (2008). A cluster of conserved basic amino acids near  
538 the C-terminus of the PB1 subunit of the influenza virus RNA polymerase is involved in the  
539 regulation of viral transcription. *Virology* 373, 202–210.
- 540 Kirui, J., Bucci, M.D., Poole, D.S., and Mehle, A. (2014). Conserved features of the PB2 627  
541 domain impact influenza virus polymerase function and replication. *J. Virol.* 88, 5977–5986.
- 542 Kirui, J., Mondal, A., and Mehle, A. (2016). Ubiquitination up-regulates influenza virus  
543 polymerase function. *J. Virol.* 90, 10906–10914.
- 544 Klumpp, K., Ruigrok, R.W., and Baudin, F. (1997). Roles of the influenza virus polymerase and  
545 nucleoprotein in forming a functional RNP structure. *EMBO J* 16, 1248–1257.
- 546 Kouba, T., Drncová, P., and Cusack, S. (2019). Structural snapshots of actively transcribing  
547 influenza polymerase. *Nat. Struct. Mol. Biol.* 26, 460.
- 548 Larson, G.P., Tran, V., Yú, S., Cai, Y., Higgins, C.A., Smith, D.M., Baker, S.F., Radoshitzky,  
549 S.R., Kuhn, J.H., and Mehle, A. (2019). EPS8 Facilitates Uncoating of Influenza A Virus. *Cell*  
550 *Rep.* 29, 2175–2183.
- 551 Mehle, A., and Doudna, J.A. (2008). Inhibitory activity restricts the function of an avian-like  
552 influenza polymerase in primate cells. *Cell Host Microbe* 4, 111–122.
- 553 Moeller, A., Kirchdoerfer, R.N., Potter, C.S., Carragher, B., and Wilson, I.A. (2012).  
554 Organization of the influenza virus replication machinery. *Science* (80-. ). 338, 1631–1634.
- 555 Mondal, A., Victor, K.G., Pudupakam, R.S., Lyons, C.E., and Wertz, G.W. (2014). Newly  
556 Identified Phosphorylation Site in the Vesicular Stomatitis Virus P Protein Is Required for Viral  
557 RNA Synthesis. *J. Virol.* 88, 1461–1472.
- 558 Mondal, A., Potts, G.K., Dawson, A.R., Coon, J.J., and Mehle, A. (2015). Phosphorylation at the  
559 homotypic interface regulates nucleoprotein oligomerization and assembly of the influenza virus  
560 replication machinery. *PLoS Pathog.* 11, e1004826.
- 561 Mondal, A., Dawson, A.R., Potts, G.K., Freiburger, E.C., Baker, S.F., Moser, L.A., Bernard,  
562 K.A., Coon, J.J., and Mehle, A. (2017). Influenza virus recruits host protein kinase C to control  
563 assembly and activity of its replication machinery. *Elife* 6, e26910.
- 564 Neumann, G., Fujii, K., Kino, Y., and Kawaoka, Y. (2005). An improved reverse genetics system  
565 for influenza A virus generation and its implications for vaccine production. *Proc. Natl. Acad.*  
566 *Sci. U. S. A.* 102, 16825–16829.
- 567 Perez, J.T., Varble, A., Sachidanandam, R., Zlatev, I., Manoharan, M., García-Sastre, A., and  
568 TenOever, B.R. (2010). Influenza A virus-generated small RNAs regulate the switch from  
569 transcription to replication. *Proc. Natl. Acad. Sci. U. S. A.*
- 570 Pflug, A., Guilligay, D., Reich, S., and Cusack, S. (2014). Structure of influenza A polymerase  
571 bound to the viral RNA promoter. *Nature* 516, 355–360.

- 572 Plotch, S.J., Bouloy, M., and Krug, R.M. (1979). Transfer of 5'-terminal cap of globin mRNA to  
573 influenza viral complementary RNA during transcription in vitro. *Proc. Natl. Acad. Sci.* 76, 1618–  
574 1622.
- 575 Pons, M.W., Schulze, I.T., Hirst, G.K., and Hauser, R. (1969). Isolation and characterization of  
576 the ribonucleoprotein of influenza virus. *Virology* 39, 250–259.
- 577 Reich, S., Guilligay, D., Pflug, A., Malet, H., Berger, I., Crepin, T., Hart, D., Lunardi, T., Nanao,  
578 M., Ruigrok, R.W., et al. (2014). Structural insight into cap-snatching and RNA synthesis by  
579 influenza polymerase. *Nature* 516, 361–366.
- 580 Reich, S., Guilligay, D., and Cusack, S. (2017). An in vitro fluorescence based study of initiation  
581 of RNA synthesis by influenza B polymerase. *Nucleic Acids Res.* 45, 3353–3368.
- 582 Richard, C.-A., Rincheval, V., Lassoued, S., Fix, J., Cardone, C., Esneau, C., Nekhai, S.,  
583 Galloux, M., Rameix-Welti, M.-A., Sizun, C., et al. (2018). RSV hijacks cellular protein  
584 phosphatase 1 to regulate M2-1 phosphorylation and viral transcription. *PLOS Pathog.* 14,  
585 e1006920.
- 586 Robb, N.C., Smith, M., Vreede, F.T., and Fodor, E. (2009). NS2/NEP protein regulates  
587 transcription and replication of the influenza virus RNA genome. *J. Gen. Virol.* 90, 1398–1407.
- 588 Dos Santos Afonso, E., Escriou, N., Leclercq, I., van der Werf, S., and Naffakh, N. (2005). The  
589 generation of recombinant influenza A viruses expressing a PB2 fusion protein requires the  
590 conservation of a packaging signal overlapping the coding and noncoding regions at the 5' end  
591 of the PB2 segment. *Virology* 341, 34–46.
- 592 Schwanhäusser, B., Busse, D., Li, N., Dittmar, G., Schuchhardt, J., Wolf, J., Chen, W., and  
593 Selbach, M. (2011). Global quantification of mammalian gene expression control. *Nature* 473,  
594 337–342.
- 595 Soh, J.-W., and Weinstein, I.B. (2003). Roles of Specific Isoforms of Protein Kinase C in the  
596 Transcriptional Control of Cyclin D1 and Related Genes. *J. Biol. Chem.* 278, 34709–34716.
- 597 Tigabu, B., Ramanathan, P., Ivanov, A., Lin, X., Ilinykh, P.A., Parry, C.S., Freiberg, A.N.,  
598 Nekhai, S., and Bukreyev, A. (2018). Phosphorylated VP30 of Marburg Virus Is a Repressor of  
599 Transcription. *J. Virol.* 92, e00426-18.
- 600 Turrell, L., Lyall, J.W., Tiley, L.S., Fodor, E., and Vreede, F.T. (2013). The role and assembly  
601 mechanism of nucleoprotein in influenza A virus ribonucleoprotein complexes. *Nat. Commun.* 4,  
602 1511–1591.
- 603 Vreede, F.T., Jung, T.E., and Brownlee, G.G. (2004). Model Suggesting that Replication of  
604 Influenza Virus Is Regulated by Stabilization of Replicative Intermediates. *J. Virol.* 78, 9568–  
605 9572.
- 606 Vreede, F.T., Ng, A.K.-L., Shaw, P.-C., and Fodor, E. (2011). Stabilization of Influenza Virus  
607 Replication Intermediates Is Dependent on the RNA-Binding but Not the Homo-Oligomerization  
608 Activity of the Viral Nucleoprotein. *J. Virol.* 85, 12073–12078.
- 609 Weber, A., Dam, S., Saul, V. V., Kuznetsova, I., Müller, C., Fritz-Wolf, K., Becker, K., Linne, U.,  
610 Gu, H., Stokes, M.P., et al. (2019). Phosphoproteome Analysis of Cells Infected with Adapted  
611 and Nonadapted Influenza A Virus Reveals Novel Pro- and Antiviral Signaling Networks. *J.*  
612 *Virol.* 93.
- 613 Yewdell, J.W., Frank, E., and Gerhard, W. (1981). Expression of influenza A virus internal



614 antigens on the surface of infected P815 cells. *J. Immunol.* *126*, 1814–1819.

615 York, A., Hengrung, N., Vreede, F.T., Huiskonen, J.T., and Fodor, E. (2013). Isolation and  
616 characterization of the positive-sense replicative intermediate of a negative-strand RNA virus.  
617 *Proc. Natl. Acad. Sci. U. S. A.* *110*, E4238-45.

618

619

620

## Figure 1

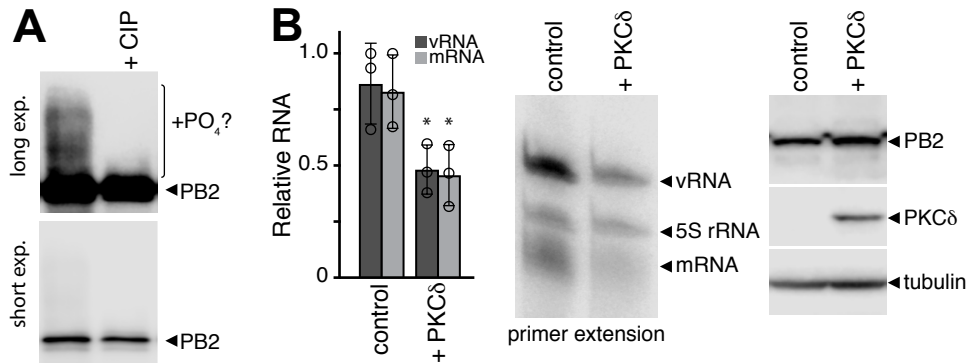

**Figure 1: PKC $\delta$  stimulates polymerase phosphorylation and inhibits polymerase activity.** **A.** The viral polymerase proteins and the mini-gene vNP77 were expressed in cells with a constitutively active form of PKC $\delta$ . The polymerase was immunopurified, mock treated or incubated with calf-intestinal phosphatase (CIP), and analyzed by western blot. Long and short exposures of the same blot are shown. A CIP-sensitive species that may indicate phosphorylated PB2 is indicated. **B.** Primer extension assays were performed on RNA extracted from cells expressing the viral polymerase, vNP77 and constitutively active PKC $\delta$  or an empty vector control. Viral replication (vRNA) and transcription (mRNA) were quantified, normalized to the 5S rRNA internal control, and presented relative to polymerase without PKC $\delta$  (mean of  $n=3 \pm$  sd; \* = Student's t-test  $P < 0.05$ ). Representative primer extension data are shown with western blots to confirm protein expression.

## Figure 2

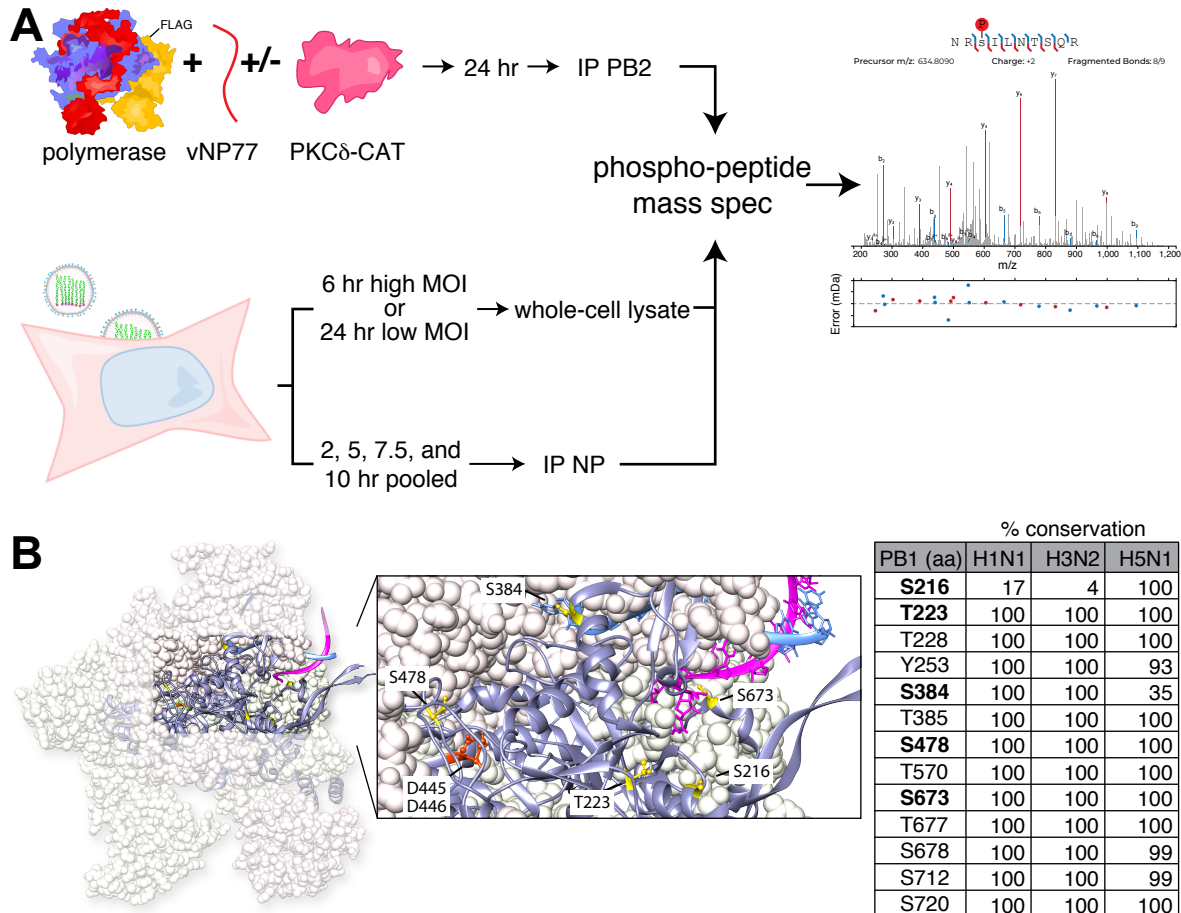

**Figure 2: The catalytic core of the viral polymerase is phosphorylated during infection. A.** Experimental design to detect phosphorylation of an active polymerase in transfected 293T cells or infected A549 cells. Samples were prepared as whole-cell lysate or immuno-purified proteins prior to phospho-peptide mass spectrometry. A representative spectra is show. See Supplemental Table 1 for all identified sites. **B.** Phospho-sites on PB1 surround the catalytic core and template entry. The location of PB1 phospho-sites characterized in this study are modeled in yellow on PDB 4WSB (Reich et al., 2014). The motif C residues D445/D446 in the catalytic site are in orange, 5' vRNA is blue, and 3' vRNA is magenta. The space-filled representation of PA and PB2 are shown as light pink and light yellow, respectively. Most phospho-sites are conserved among circulating human influenza virus strains and highly pathogenic H5N1 viruses. Percentage of sequences where the indicated residue is a serine, threonine, or tyrosine are shown.

## Figure 3

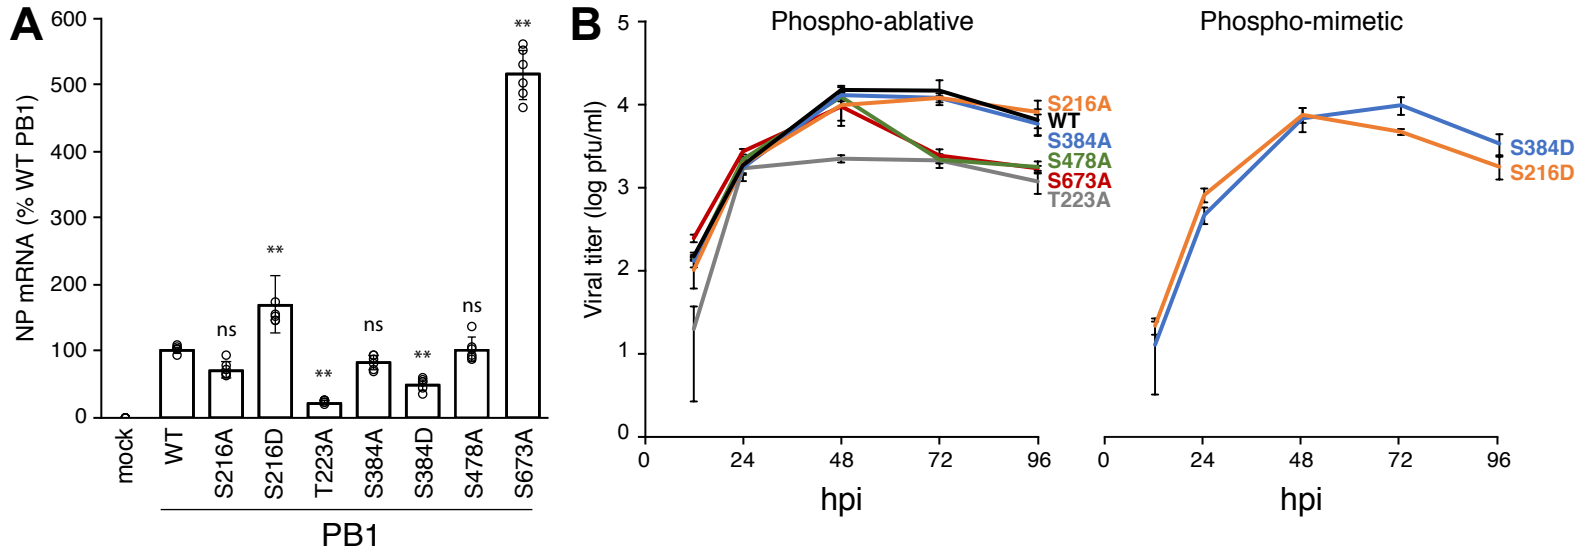

**Figure 3: PB1-mutant viruses identify phosphorylation sites that impact polymerase activity and viral replication. A.** PB1 phosphorylation both inhibits and enhances viral transcription. Single-cycle infections with PB1 phospho-mutant viruses were performed in A549 cells (MOI of 0.5 for 8h). RNA from infected cells was subject to qRT-PCR to detect NP and GAPDH mRNA. Fold changes ( $\Delta\Delta CT$ ) were determined in triplicate from 2 independent infections. ( $\pm$  SEM; \*\* =  $P < 0.01$  for one-way ANOVA with Dunnett's post hoc compared to WT). **B.** Multicycle replication kinetics of phospho-mutant viruses. A549 cells were infected at an MOI of 0.001. Viral titers were measured 12, 24, 48, 72, 96 hpi via plaque assay on MDCK cells. (mean of  $n=3 \pm$  sd).  $P < 0.01$  for one-way ANOVA at each time point. Statistics for ANOVA with Dunnett's post hoc pair-wise comparisons to WT are in Supplemental Table 2.

## Figure 4

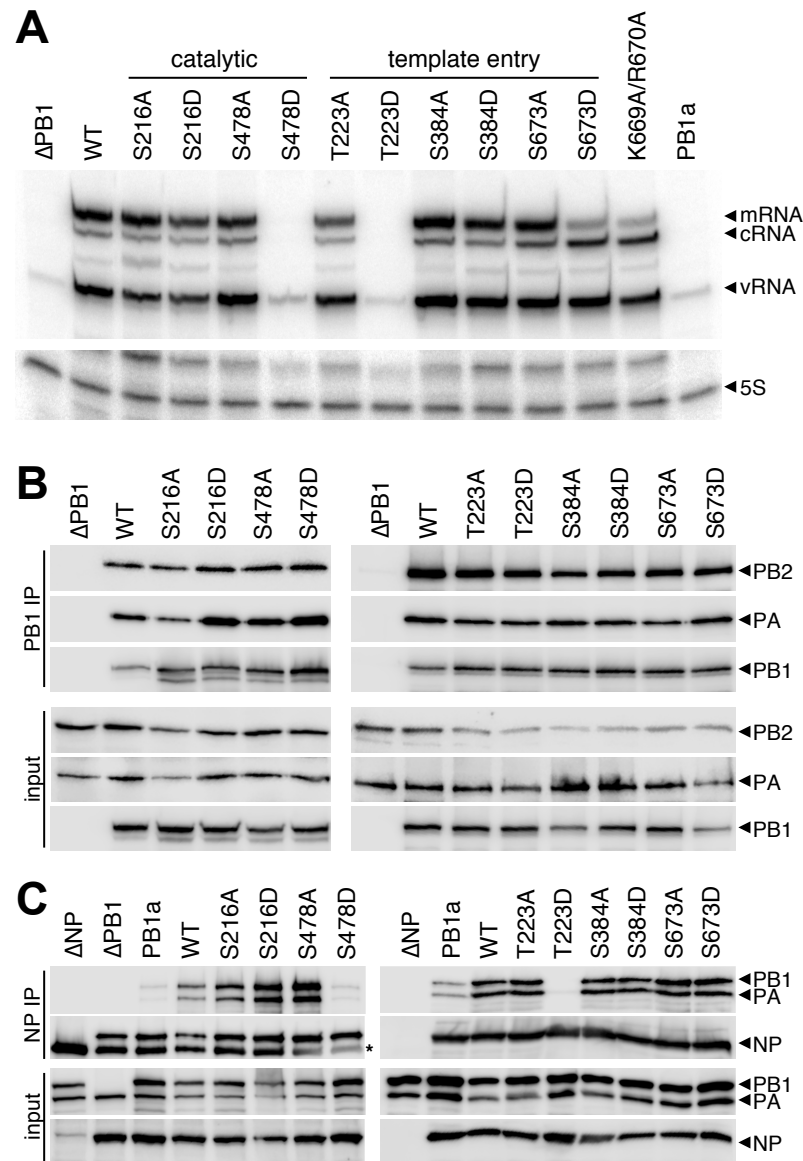

**Figure 4: PB1 phospho-mutants are defective in RNA synthesis and RNP formation.** **A.** Viral RNA synthesis was analyzed in primer extensions assays. RNA extracted from 293T cells expressing the viral polymerase, NP, and segment 6 vRNA was subject to primer extension analysis to detect transcription (mRNA) and replication (cRNA, vRNA) products. Primer extension of 5S rRNA was used as an internal loading control. PB1a, catalytically-dead PB1; PB1 K669A/R670A, transcription-deficient PB1. **B.** PB1 phospho-mutants form polymerase trimers. FLAG-tagged PB1, PB2, and PA were expressed in 293T cells and cell lysates were subject to PB1-FLAG immunoprecipitation. Immunoprecipitates and input samples were probed for PB1-FLAG, PB2, and PA. **C.** PB1 phospho-mimetics deficient in RNA synthesis fail to generate productive RNPs. NP immunoprecipitations were performed on 293T lysates generated as in (A). Immunoprecipitates and input samples were western blotted for PB1, PA, and NP.

## Figure 5

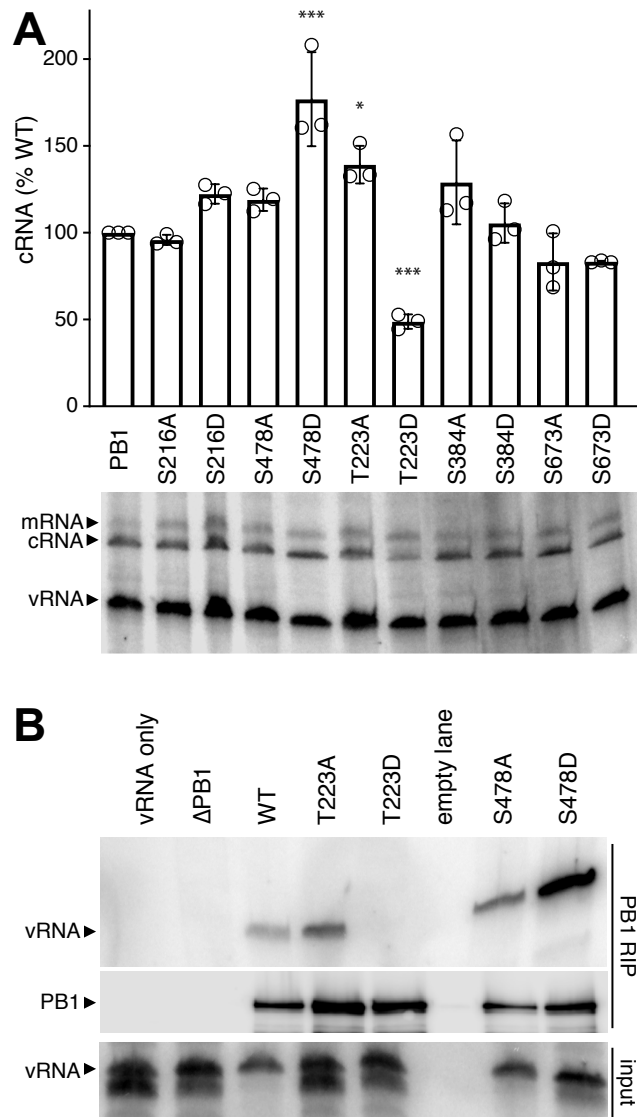

**Figure 5: Phosphorylation at T223 inhibits cRNA stabilization and vRNA binding.** **A.** PB1 phospho-mutants were tested in a cRNA stabilization assay. WT or mutant PB1 and oligomerization-deficient NP (NPE339A) were expressed in 293T cells. Cells were treated with actinomycin D (ActD) prior to infection, RNA extraction and primer extension analysis to detect transcription (mRNA) and replication (cRNA, vRNA) products. A representative primer extension gel is shown. cRNA levels were quantified, normalized to WT, and expressed as mean  $\pm$  sd. \*  $< 0.05$ , \*\*  $< 0.01$ , \*\*\*  $< 0.001 = P$  for one-way ANOVA with Dunnett's post hoc compared to WT. **B.** PB1 T223D fails to precipitate vRNA in an RNA-IP (RIP). PB1-FLAG, PB2, PA, and segment 6 vRNA were expressed in 293T cells. Cells were lysed and subject to FLAG immunoprecipitation. RNA extracted from immunoprecipitates and input samples was probed for the presence of segment 6 vRNA via primer extension analysis. Immunoprecipitated PB1 was confirmed via western blot.

## Figure 4 Fig S1

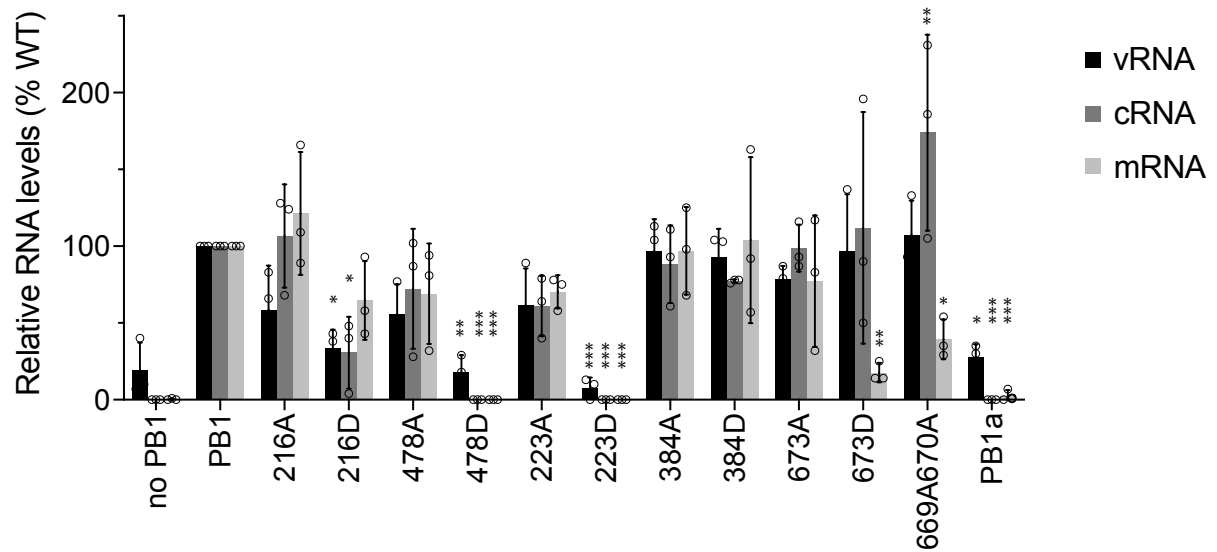

**Figure 4 Figure Supplement 1: Quantification of replicate primer extension assays.** Three independent primer extension assays were quantified with each RNA species normalized to WT within an experiment. Data are presented at mean  $\pm$  sd. \* < 0.05, \*\* < 0.01, \*\*\* < 0.001 = P for one-way ANOVA with Dunnett's post hoc compared to WT.

## Figure 5 Fig S1

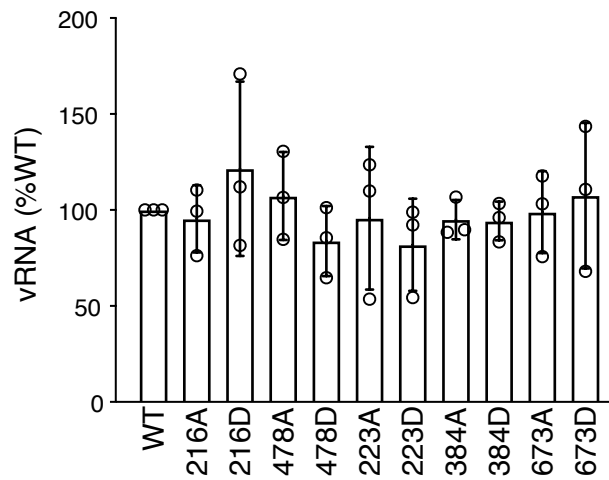

**Figure 5 Figure Supplement 1:** Quantification of replicate cRNA stabilization assays. vRNA levels were quantified from three independent stabilization assays and normalized to WT. Data are presented at mean  $\pm$  sd. There was no significant difference when analyzed by a one-way ANOVA.
